# Supplementary material for: Muscle, Ageing and Temperature Influence the Changes in Texture, Cooking Loss and Shrinkage of Cooked Beef
Source: PubMed Central journal article supplement (PMC7555138; doi:10.3390/foods9091289), 2020-09-14

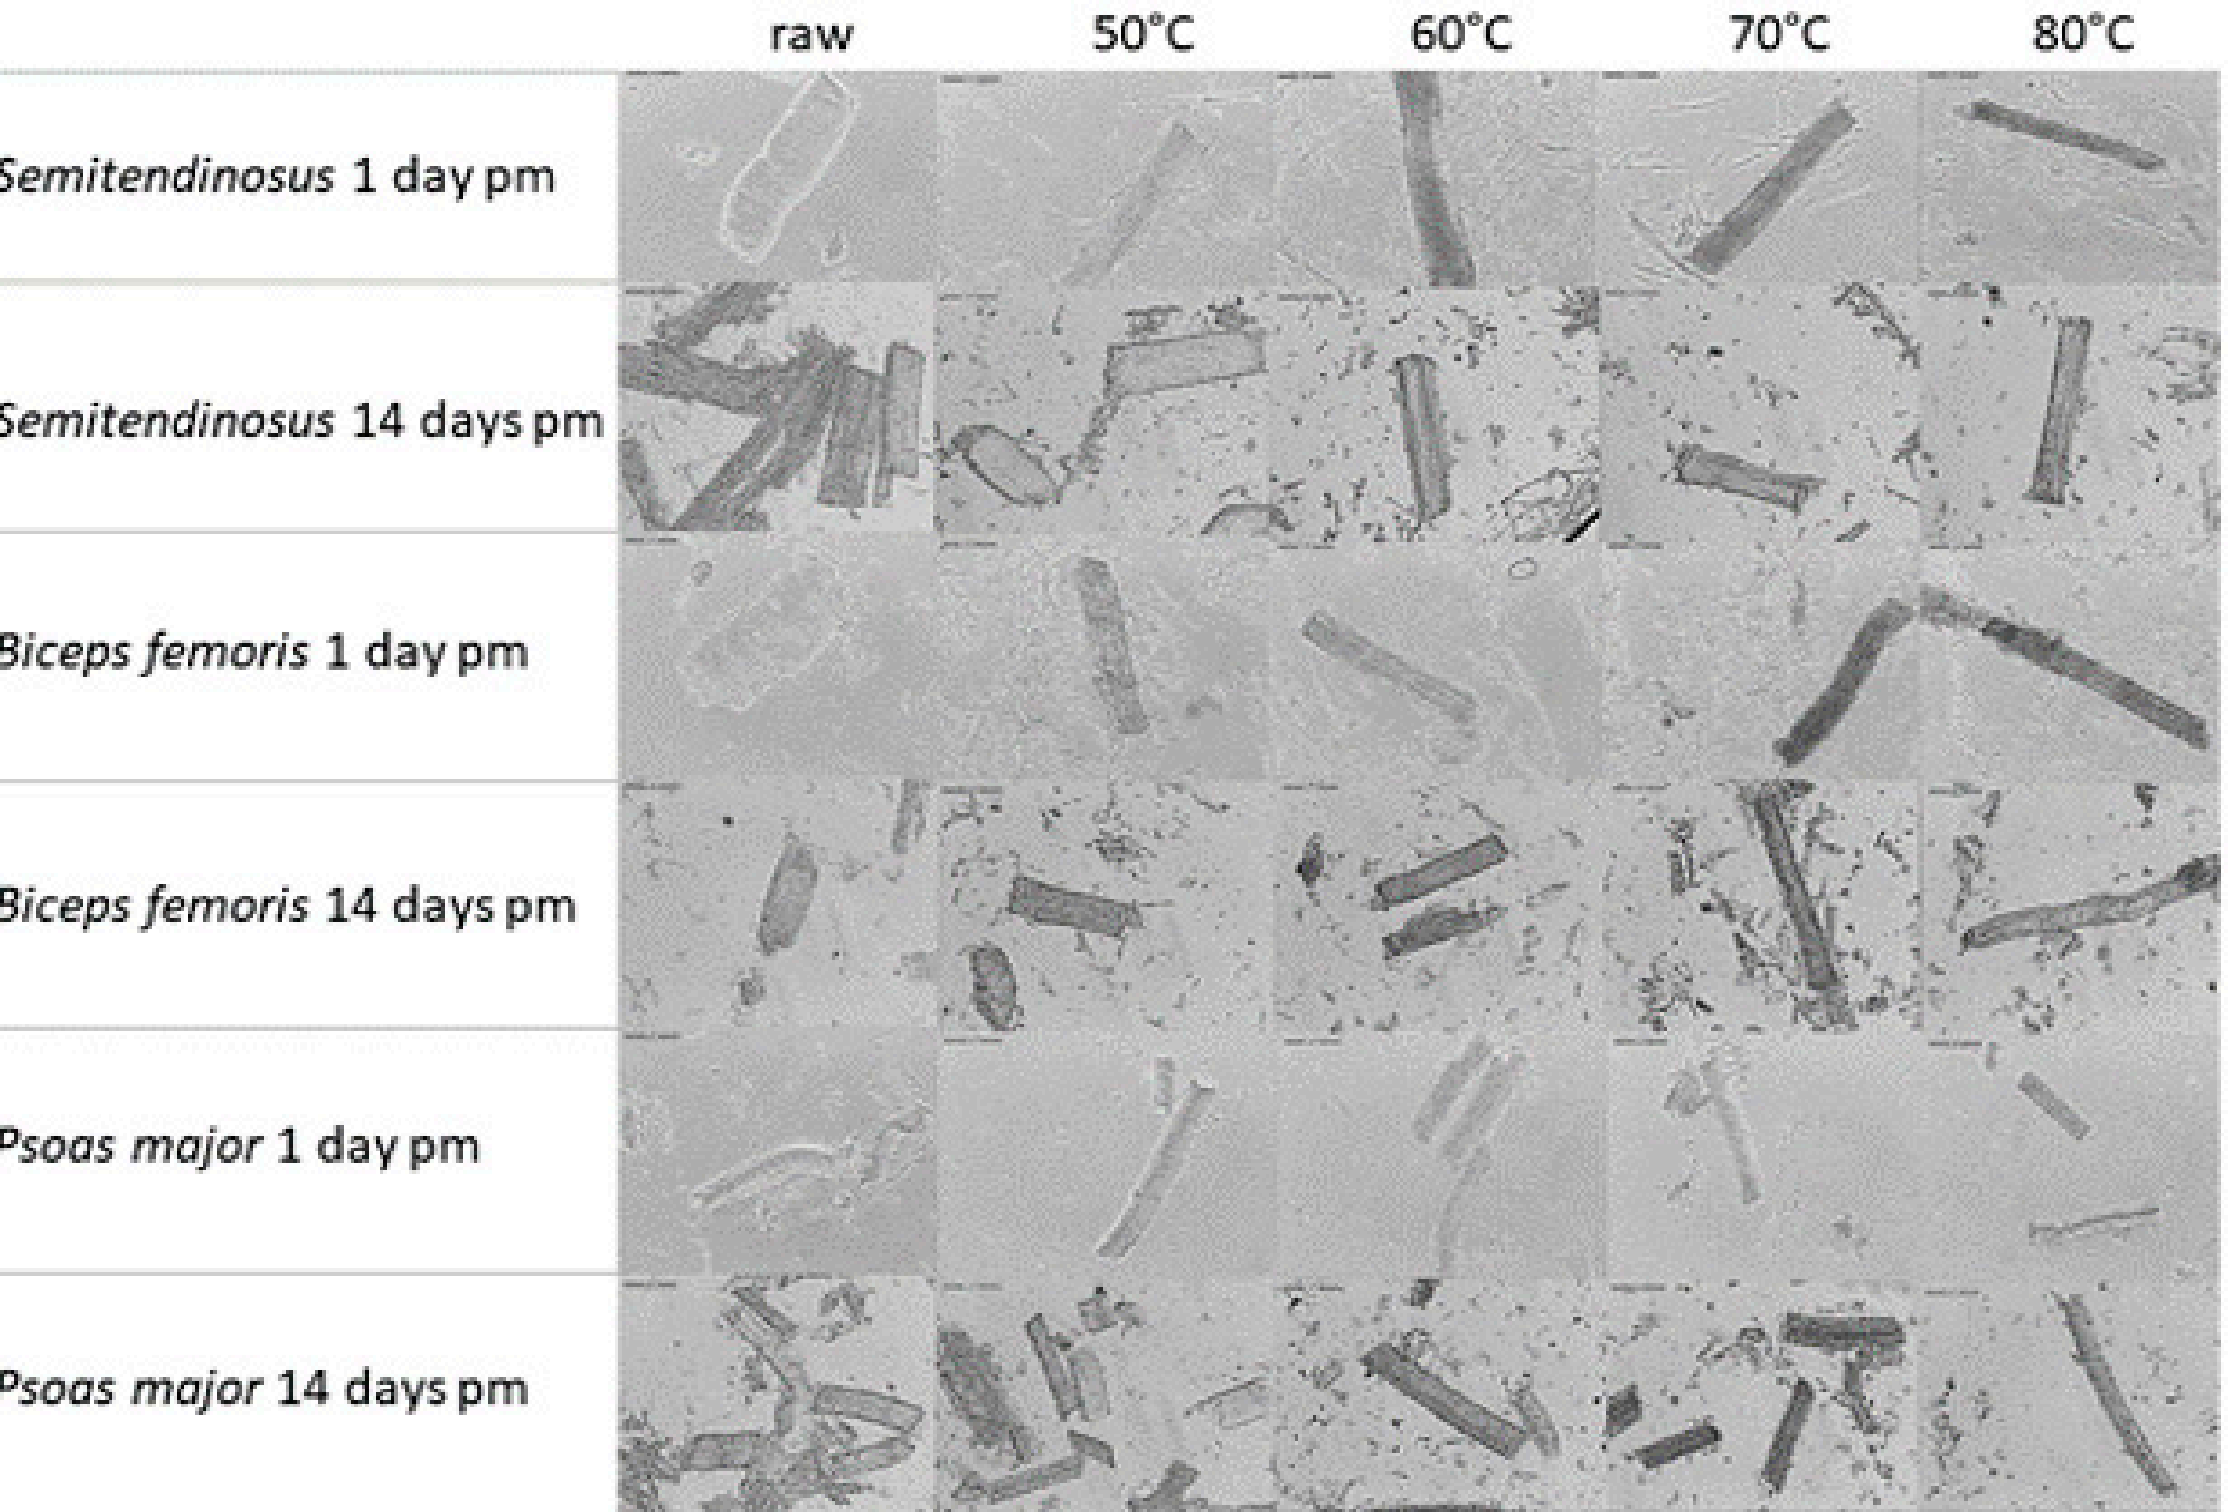

Supplement: foods-09-01289-s001.pdf [file foods-09-01289-s001.pdf]
